# Supplementary material for: Listeria monocytogenes Requires the RsbX Protein To Prevent SigB Activation under Nonstressed Conditions
Source: PubMed Central journal article supplement (PMC8765406; doi:10.1128/jb.00486-21), 2022-01-18

## Supplementary material

### ***Listeria monocytogenes* requires the RsbX protein to prevent SigB-activation under non-stressed conditions.**

Ana H. Oliveira<sup>1,2,3</sup>, Teresa Tiensuu<sup>1,2,3</sup>, Duarte N. Guerreiro<sup>4</sup>, Hasan Tükenmez<sup>1,2,3,5</sup>,  
Charlotte Dessaux<sup>6,¤</sup>, Francisco García-del Portillo<sup>6</sup>, Conor O'Byrne<sup>4</sup> and Jörgen  
Johansson<sup>1,2,3,\*</sup>.

<sup>1</sup>Laboratory for Molecular Infection Medicine Sweden, Umeå University, Umeå, Sweden

<sup>2</sup>Department of Molecular Biology, Umeå University, Umeå, Sweden

<sup>3</sup>Umeå Centre of Microbial Research, Umeå University, Umeå, Sweden

<sup>4</sup>Bacterial Stress Response Group, Microbiology, School of Natural Sciences, National University of Ireland, Galway, Ireland

<sup>5</sup>Department of Chemistry, Umeå University, Sweden

<sup>6</sup>Laboratory of Intracellular Bacterial Pathogens, National Center of Biotechnology, (CNB)-CSIC, Spain

\*To whom correspondence should be addressed: [jorgen.johansson@umu.se](mailto:jorgen.johansson@umu.se)

#### **Supplementary figure legends**

**Figure S1.** (A, B) Expression of SigB regulated genes in different genetic backgrounds. Northern blot analysis showing expression levels of positively (*lmo2230* and *lmo0596*) and negatively (*lmo1699*) SigB regulated genes. The strains (WT,  $\Delta sigB$ ,  $\Delta rsbX$  and  $\Delta rsbX+rsbX$ ) were grown at 37°C (A) or 23°C (B), in BHI medium in light conditions, with constant agitation

(180 r.p.m.). Samples were taken when cultures reached  $OD_{600\text{ nm}} \sim 0.8$  when RNA was extracted. tmRNA was used as a loading control. n=3. (C, D) Western blot of determining levels of SigB. WT,  $\Delta sigB$ ,  $\Delta rsbX$  and  $\Delta rsbX + rsbX$  strains were grown in BHI, at 37°C (C) or 23°C (D) in BHI medium in light conditions with constant agitation until  $OD_{600\text{ nm}} \sim 0.8$  was reached. Samples were taken and protein extracted before Western blot analysis using anti-SigB antibodies. GroEL levels were used as a loading control. n=3.

**Figure S2.** Relative levels of SigB expression in different genetic backgrounds quantified from Figure 2C and D and Figure S1C and D. The amount of SigB was quantified and normalized to the expression of GroEL in indicated strains. Dunnett's multiple comparisons test was used for statistical analysis. \* reflects a  $p$  value of  $< 0.05$  and \*\* a  $p$  value of  $< 0.01$ . ns = non significant.

**Figure S3.** Acid survival assay. WT,  $\Delta sigB$ ,  $\Delta rsbX$ ,  $\Delta rsbX + rsbX$  and  $\Delta sigB; \Delta rsbX$  strains were grown overnight and resuspended in BHI of pH 2.5, and incubated at 23°C. Samples were taken at indicated time points, spread on agar-plates to determine survival rate (CFU/ml). The graphic shows the average values of 3 biological replicates. A 2-way ANOVA with Multiple comparisons was used for statistical analysis comparing all strains at the different time points with WT. \* reflects a  $p$  value  $< 0.05$ .

**Figure S4.** (A) Biofilm production of WT,  $\Delta sigB$ ,  $\Delta rsbX$ ,  $\Delta rsbX + rsbX$  and  $\Delta sigB; \Delta rsbX$  strains. Bacteria were statically grown in a 96-well round-bottomed plate, for 24h, 48h and 72h, at 23°C in TSB medium. The graphics show the average values of 3 biological replicates. A 2-way ANOVA with Multiple comparisons was used for statistical analysis comparing all strains at the different time points with WT. \* reflects a  $P$  value  $< 0.05$ . (B) Motility assay. WT,  $\Delta sigB$ ,

*ΔrsbX* and *ΔsigB*; *ΔrsbX* strains were spotted on a motility agar plate (BHI, 0,3% agar) and grown at bench conditions (~23°C) for 24 hours. n=3. (C) Levels of FlaA in different genetic backgrounds. WT, *ΔsigB*, *ΔrsbX*, *ΔrsbX + rsbX* and *ΔsigB; ΔrsbX* strains were grown in BHI, at 23°C, with constant agitation (180 r.p.m.) until OD<sub>600</sub> nm~0.8 was reached. At this time-point, protein was extracted and the levels of FlaA determined by western blot analysis, using anti-FlaA antibodies. A commassie-stained gel was used as a loading control (below). n=3.

**Figure S5.** *In vivo* RsbT crosslinking experiment. WT, *ΔrsbX* and RsbT<sub>N49A</sub> (kinase mutant) mutant strains were grown in BHI, at 37°C, until OD<sub>600</sub> of 0.8 was reached. At this OD, half of the cultures were stressed by 0.5M of NaCl for 5 min. For samples being cross-linked, formaldehyde was added and incubated for 10 mins before protein extraction and western blot using an anti-RsbT antibody. A *ΔrsbR1* mutant strain (also devoid of RsbT expression) was used as a negative control. n=3.

**Figure S6.** *In vivo* RsbR1 cross-linking and cross-linking reversal. WT, *ΔrsbX* and RsbT<sub>N49A</sub> strains were grown in BHI, at 37°C, until OD<sub>600</sub> nm of 0.8. For samples being cross-linked, formaldehyde was added and incubated for 10 minutes. For the reversal of the cross-linking, the same samples were incubated at 95°C, for either 15 minutes (crosslink 15 min) or 30 minutes (crosslink 30 min). At these time-points, protein was extracted and western blot performed using an anti-RsbR1 antibody. The monomeric form of RsbR1 (~30 kD) is indicated by \* and the putative dimeric form of RsbR1 (~70kDa) is indicated by \*\*. A *ΔrsbR1* mutant was used as a negative control.

Fig. S1

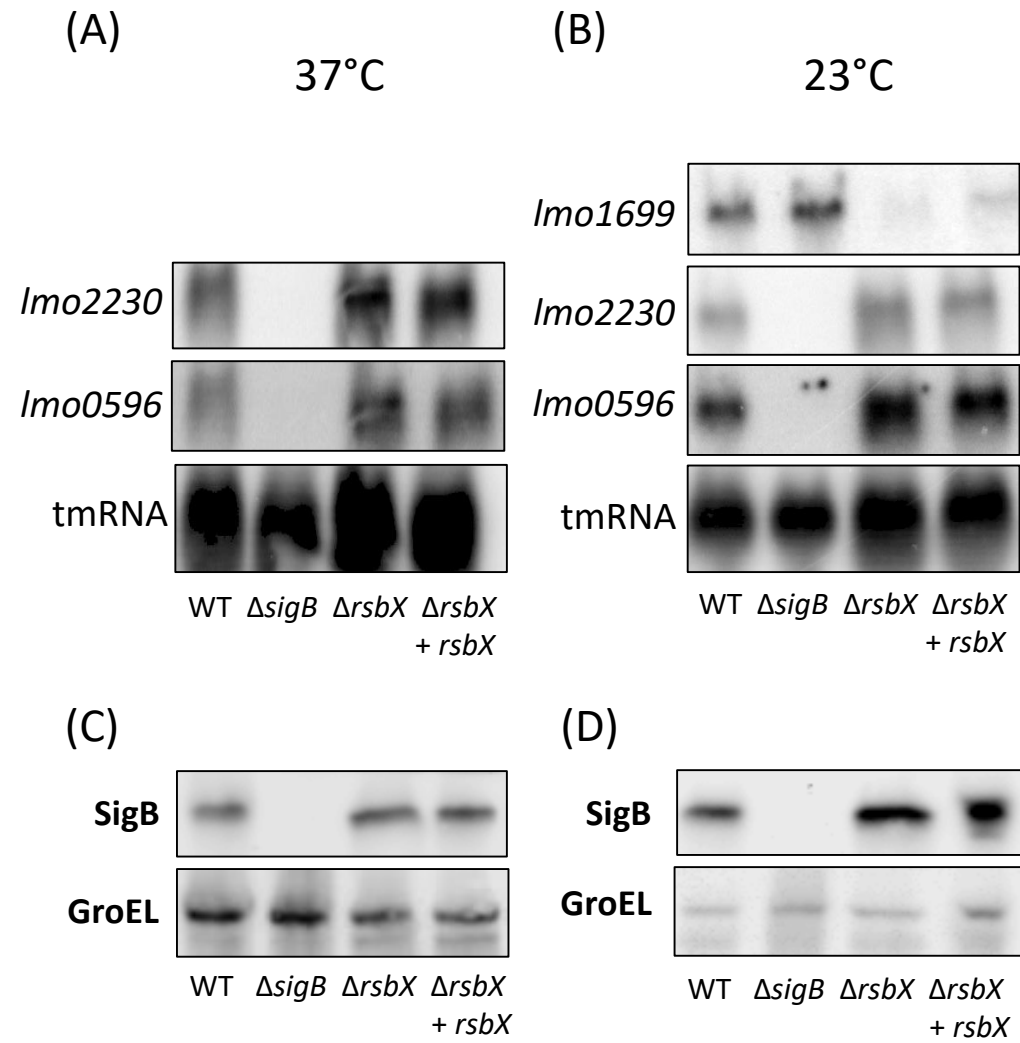

Fig. S2

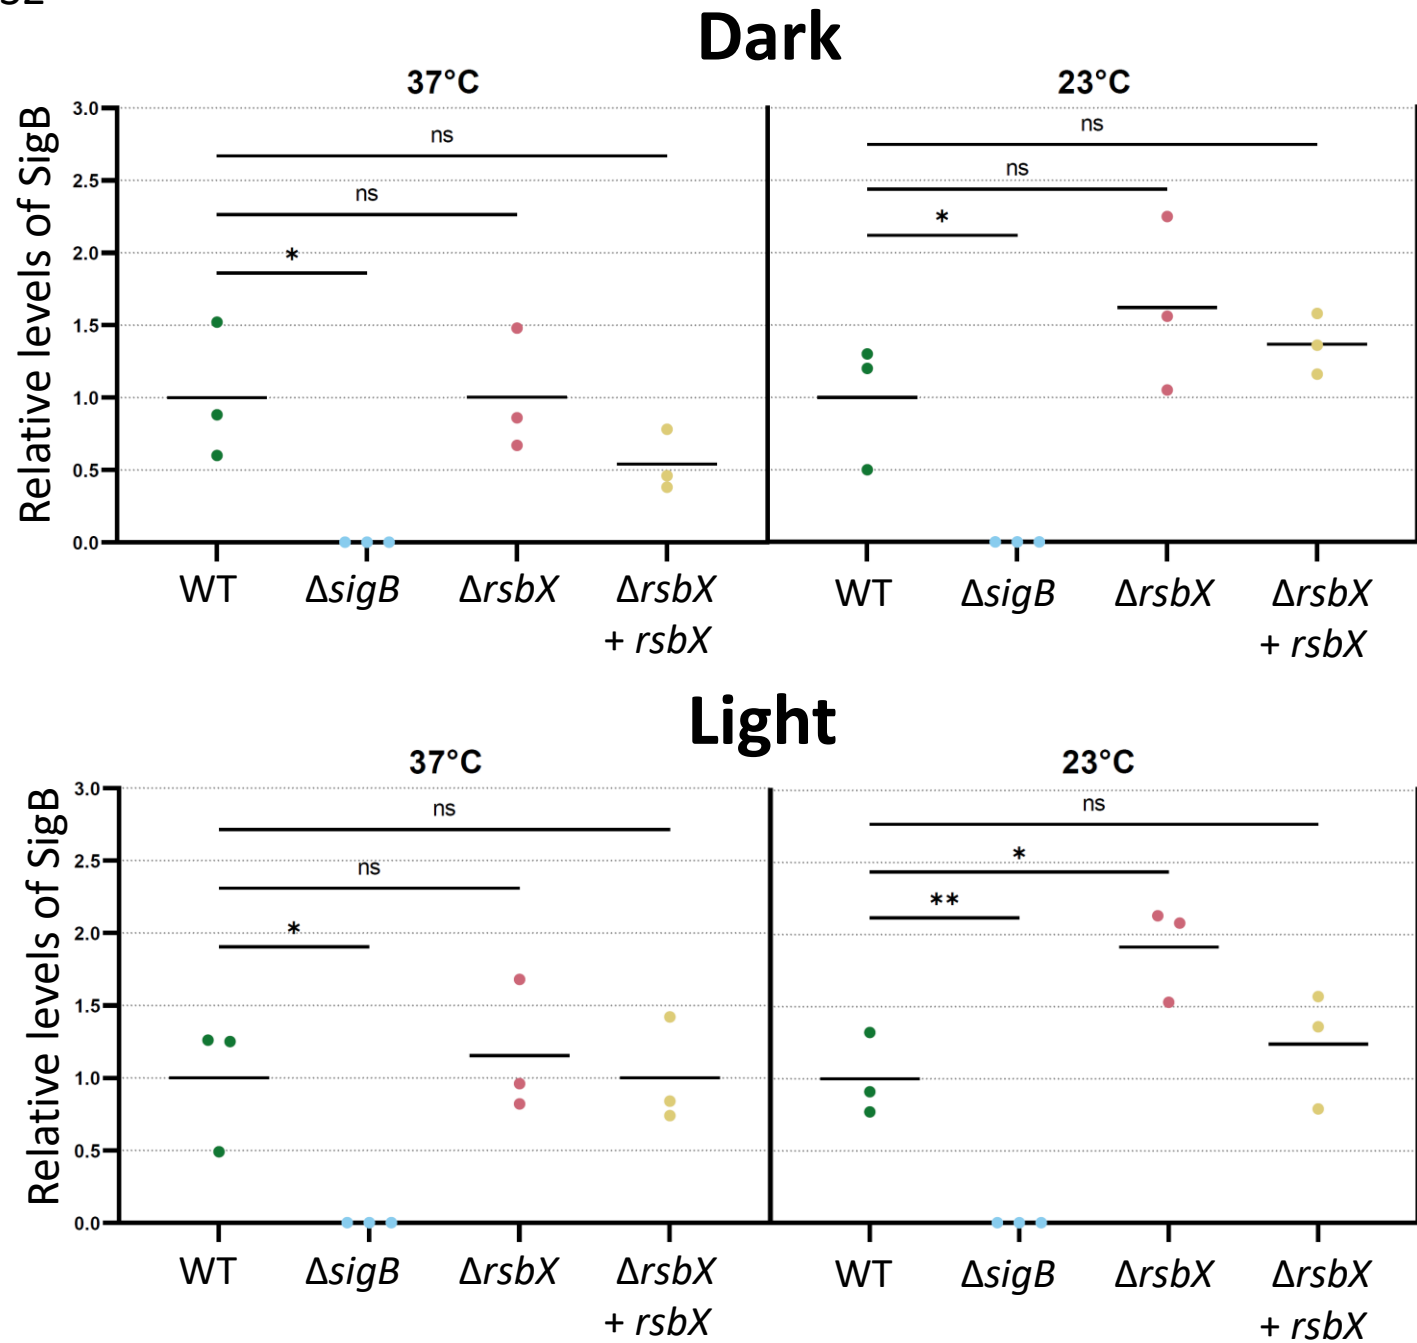

Fig. S3

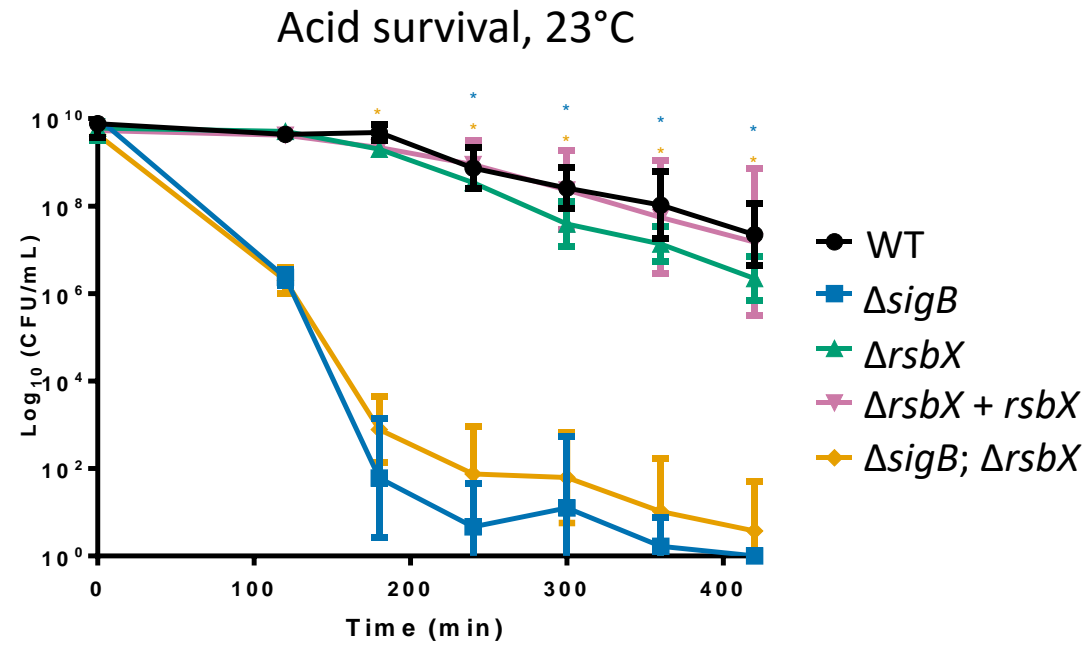

Fig. S4

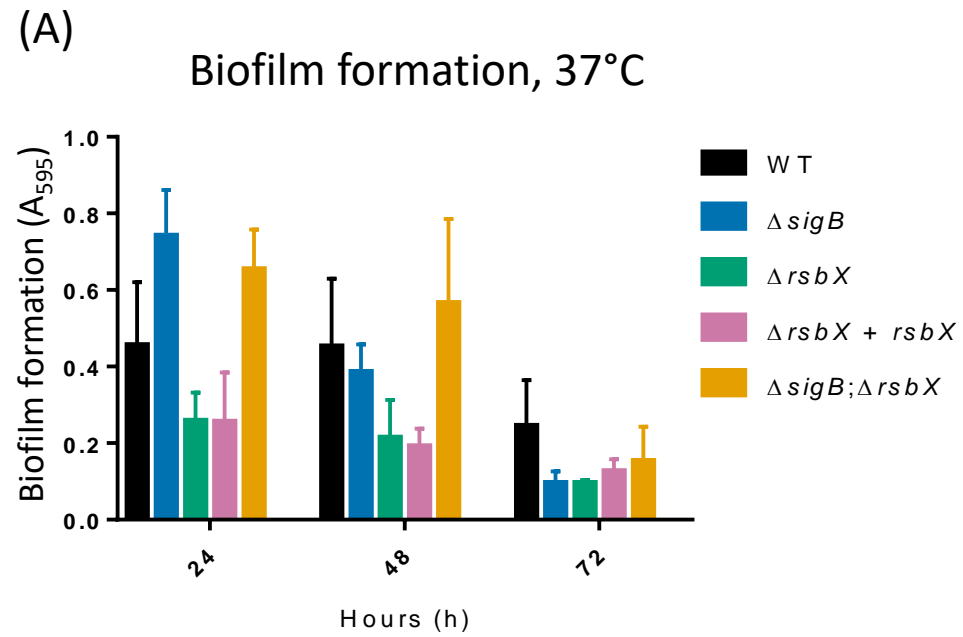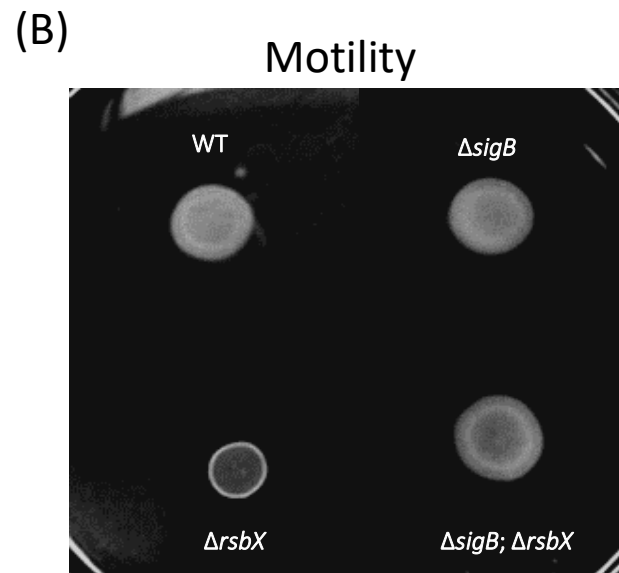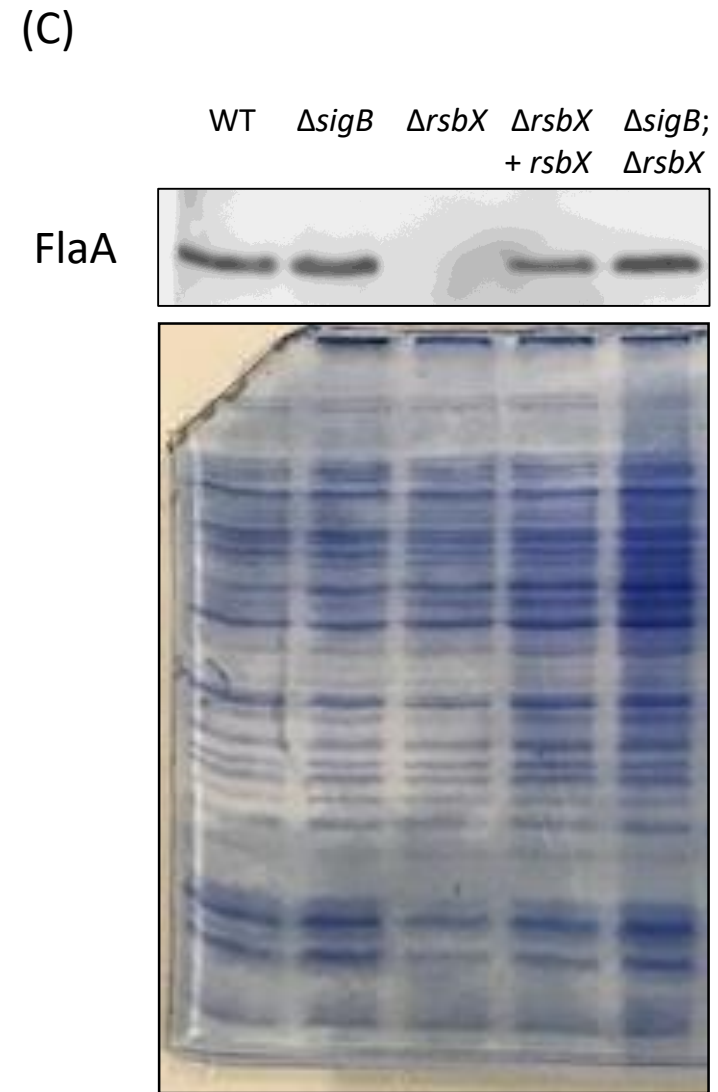

Fig. S5

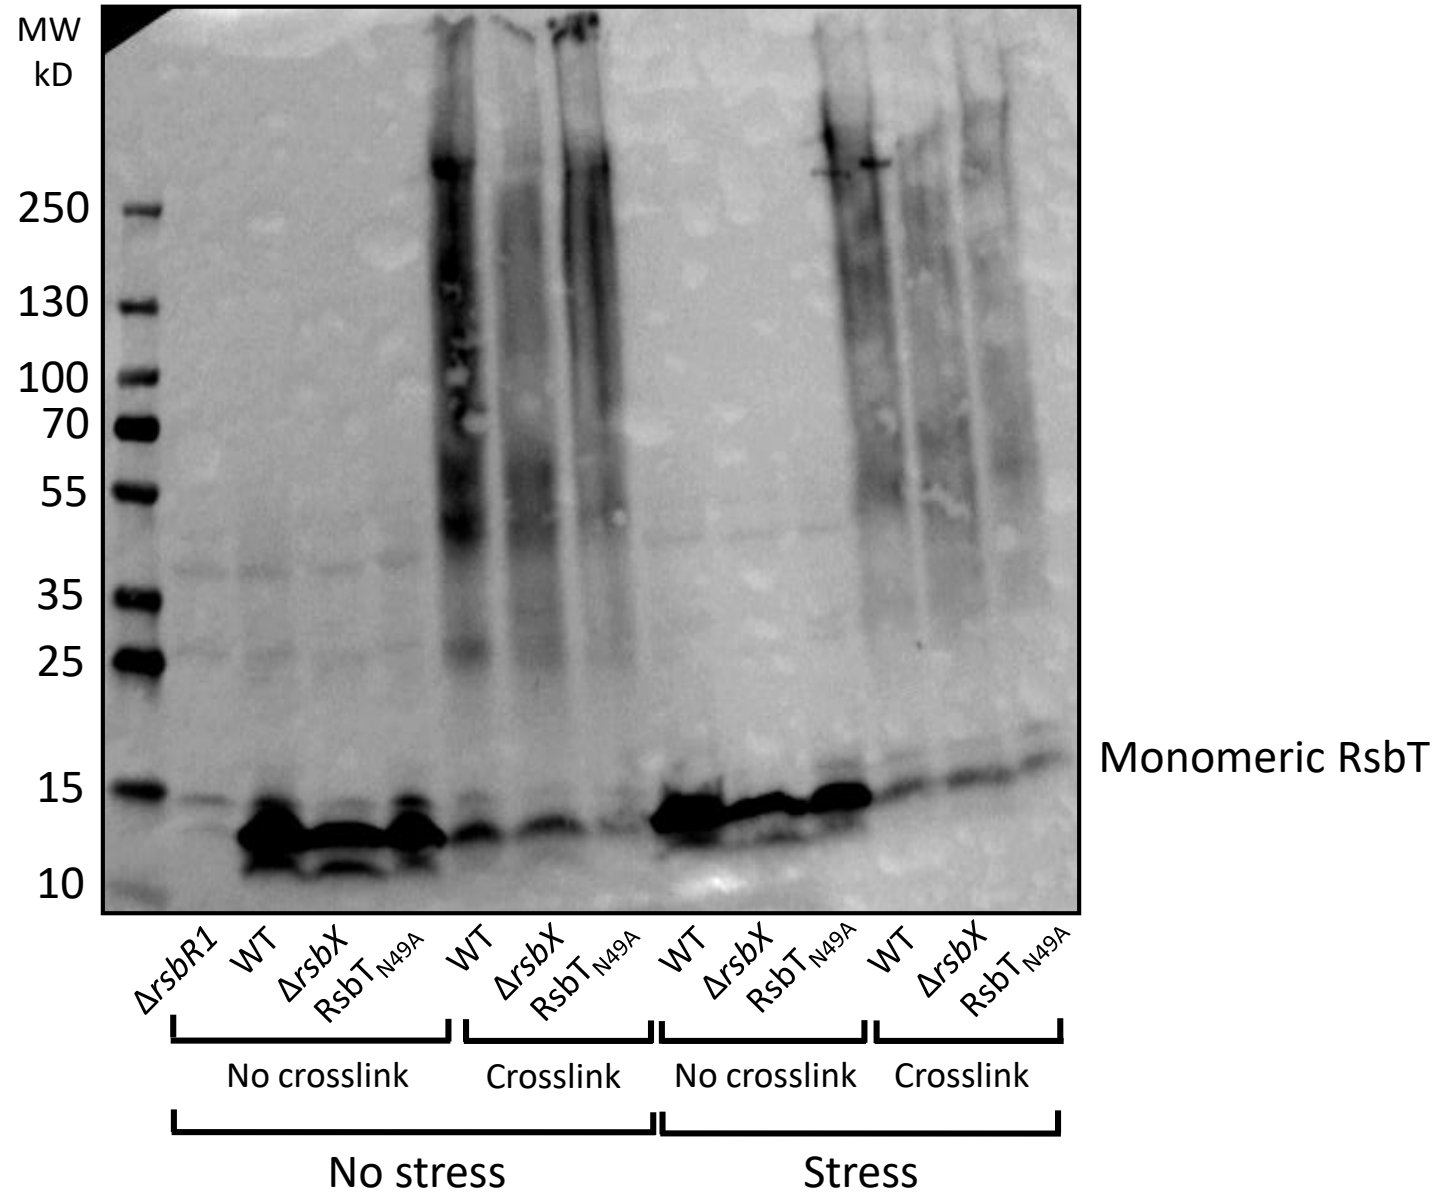



Fig. S6

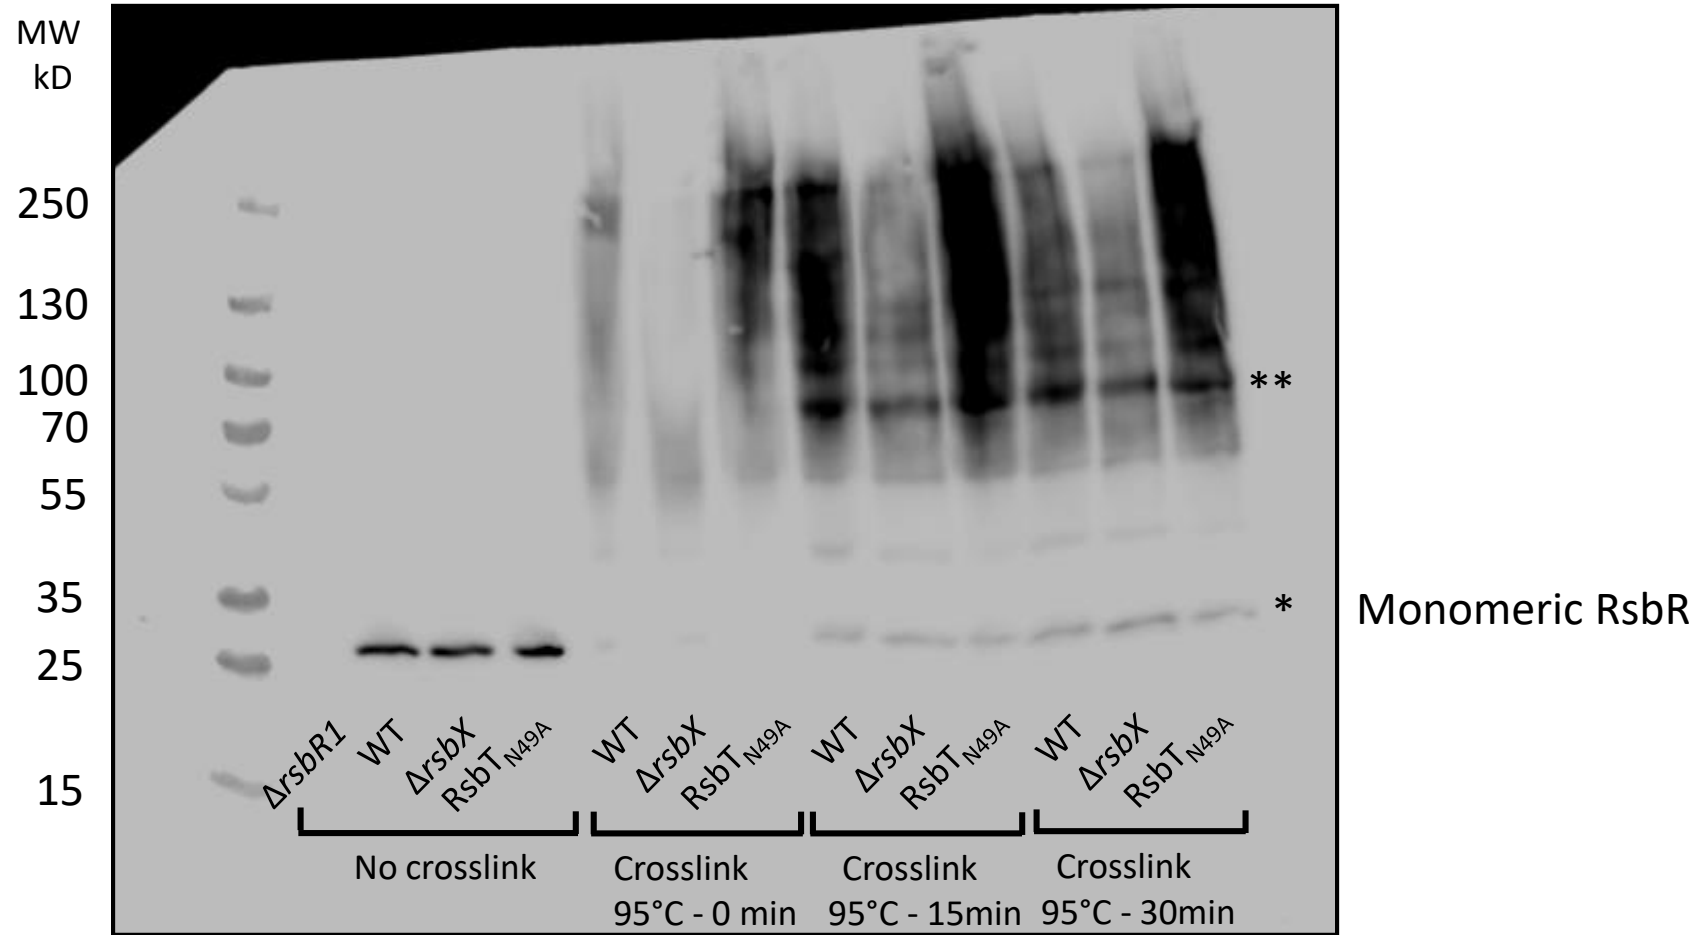

Supplement: jb.00486-21-s0001.pdf [file jb.00486-21-s0001.pdf]
